# Supplementary material for: Selective Attention Enhances Beta-Band Cortical Oscillation to Speech under “Cocktail-Party” Listening Conditions
Source: PubMed Central journal article supplement (PMC5300994; doi:10.3389/fnhum.2017.00034), 2017-02-10
Supplement: Image_1.pdf [file Image_1.pdf]

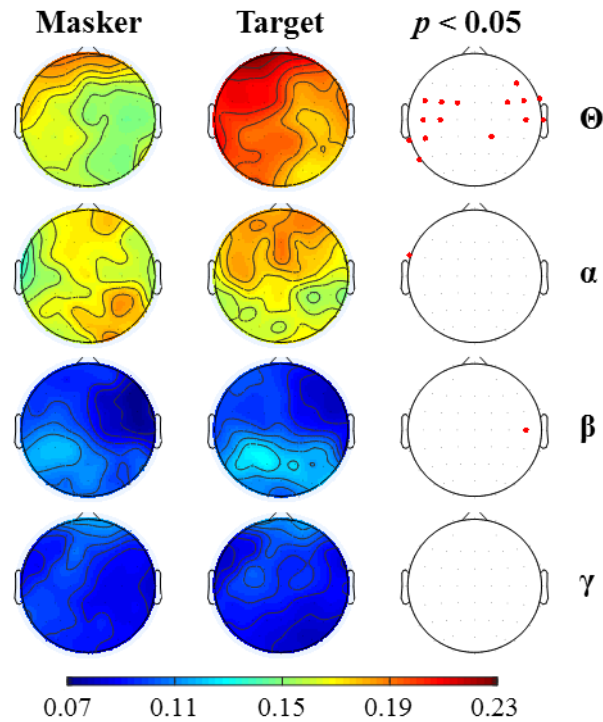

**Figure S1.** Scalp topographical maps showing location distributions of absolute correlations between the EEGs to the mixed-speech complex and the EEGs to either a single-voiced masker speech (left column) or a single-voiced target speech (middle column) for each of the 4 frequency bands [theta ( $\theta$ ), alpha ( $\alpha$ ), beta ( $\beta$ ), gamma ( $\gamma$ )]. The right columns: for each of the 4 frequency bands, the recordings sites at which the correlation difference between the 2 correlations was significant when the p level was 0.05. The statistically thresholded topographical map indicating that the theta oscillation significantly tracked the target against the masker in the bilateral temporal cortex.
