# Supplementary material for: Selective Attention Enhances Beta-Band Cortical Oscillation to Speech under “Cocktail-Party” Listening Conditions
Source: PubMed Central journal article supplement (PMC5300994; doi:10.3389/fnhum.2017.00034), 2017-02-10
Supplement: Image_2.pdf [file Image_2.pdf]

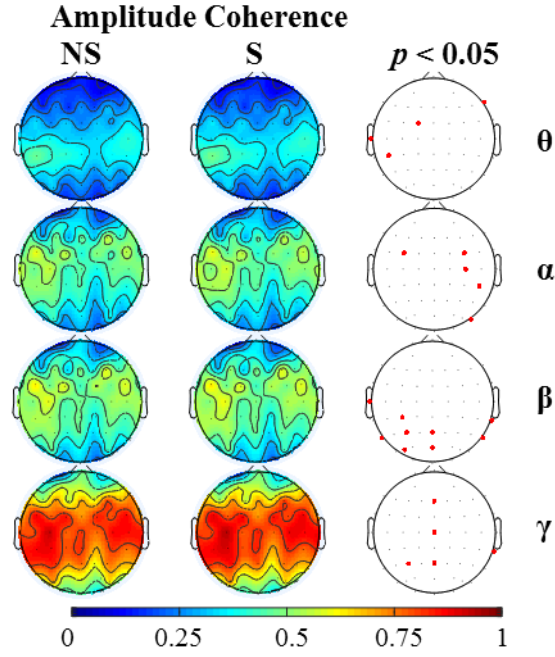

**Figure S2.** The 2 left columns: for each of the 4 frequency bands [theta ( $\theta$ ), alpha ( $\alpha$ ), beta ( $\beta$ ), gamma ( $\gamma$ )], scalp topographical maps showing location distributions of amplitude coherence between the EEG to the mixed-speech complex and the EEG to a single speech under either the selective attention (S) condition or the non-selective attention (NS) condition. The right columns: for each of the 4 frequency bands, the recordings sites at which the correlation difference between the 2 attention conditions was significant when the p level was 0.05. The statistically thresholded topographical map indicating the more coherence at selective attention condition than non-selective condition in each band. The amplitude coherence is calculated as:

$$Amplitude\ Coherence_{ij} = \sqrt{\frac{(sA_{ij}^2 - aA_{ij}^2) + (mA_{ij}^2 - aA_{ij}^2)}{2}}{aA_{ij}^2}$$

where  $A_{ij}$  is the Amplitude at the frequency bin I and temporal bin j, respectively. And sA is the amplitude of EEG to the single-speech, mA is the amplitude of EEG to the mixed-speech, and aA is the average of sA and mA.
